# Supplementary material for: Transcriptomic Characterization of Temperature Stress Responses in Larval Zebrafish
Source: PubMed Central journal article supplement (PMC3364249; doi:10.1371/journal.pone.0037209), 2012-05-30

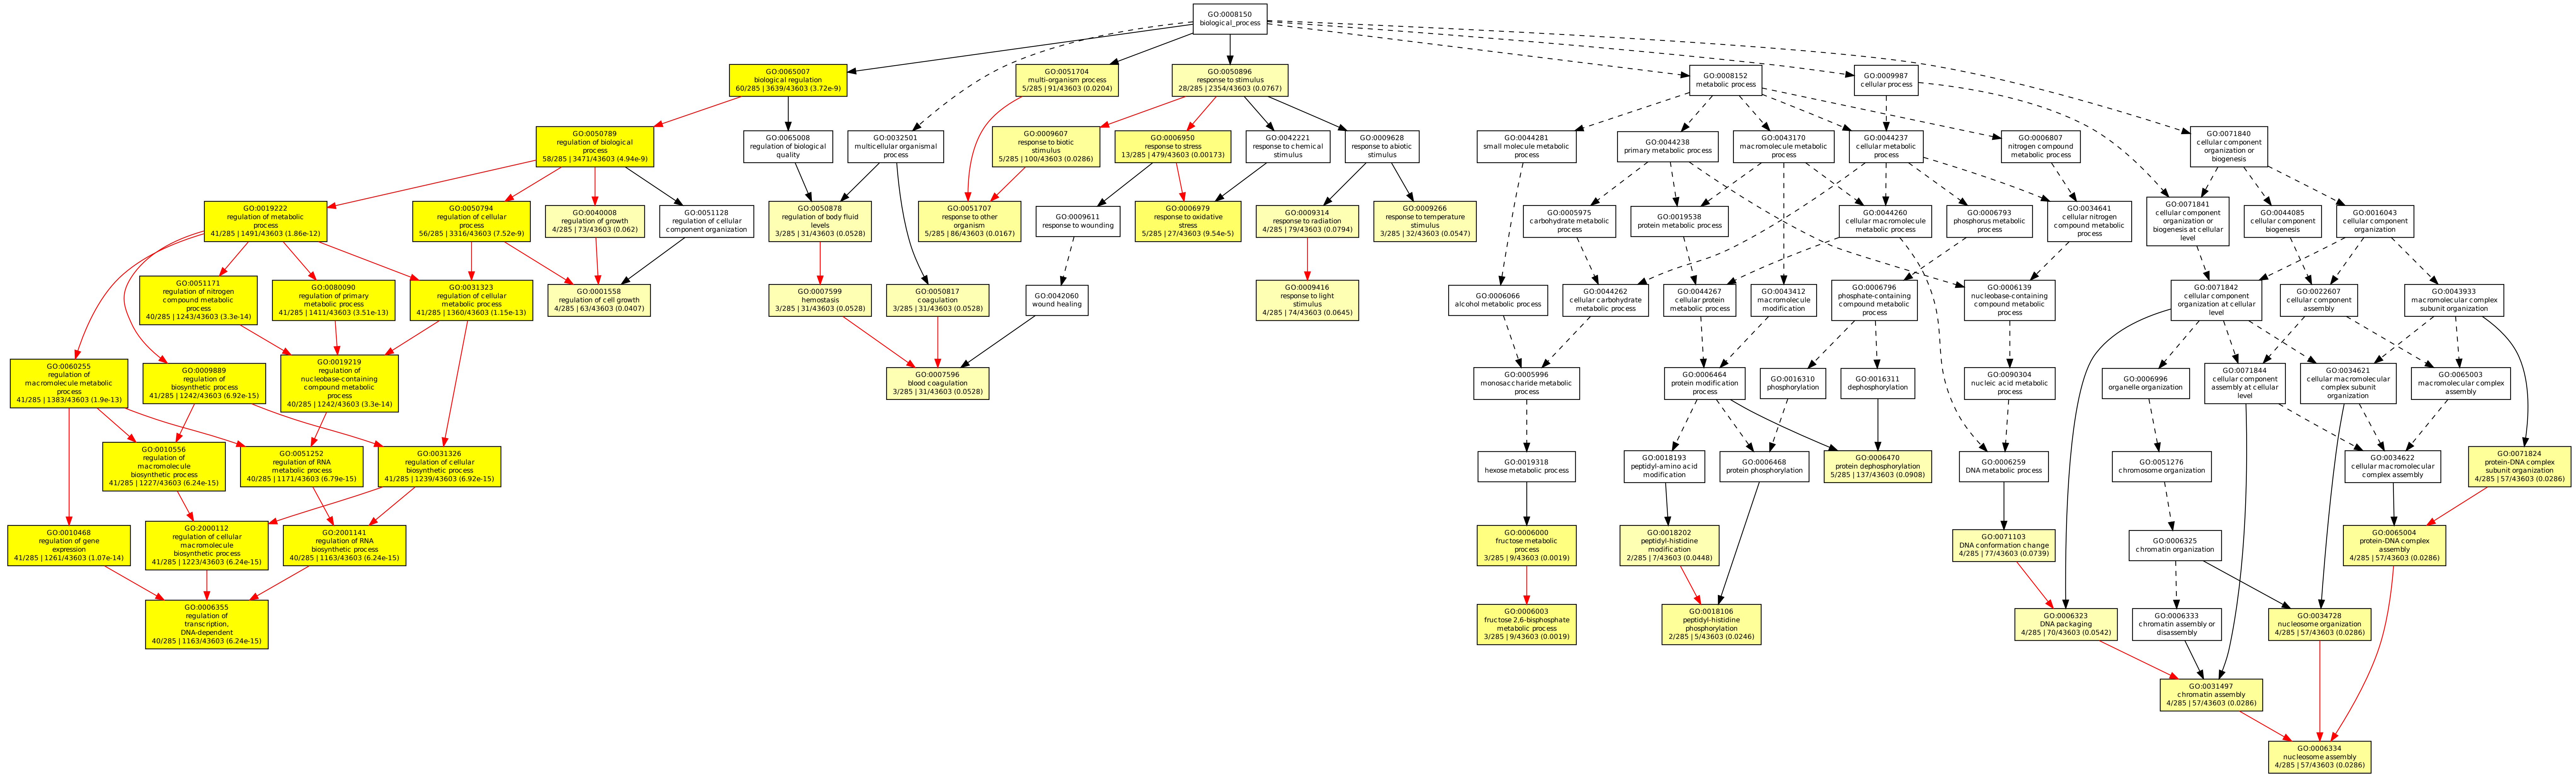

Supplement: pone.0037209.s003.pdf [file pone.0037209.s003.pdf]
