# Supplementary material for: Transcriptomic Characterization of Temperature Stress Responses in Larval Zebrafish
Source: PLoS One. 2012 May 30;7(5):e37209. doi: 10.1371/journal.pone.0037209 (PMC3364249; doi:10.1371/journal.pone.0037209)
Supplement: Table S2 — Selection of internal reference genes for qPCR analysis. (XLS) [file pone.0037209.s006.xls]

## Sheet: Microarray expression
Expression of candidate internal reference genes detected by microarray
GeneSymbol	ProbeName	GenBank_accession	GeneName	16℃_2h_1	16℃_2h_2	16℃_2h_3	16℃_48h_1	16℃_48h_2	16℃_48h_3	28℃_2h_1	28℃_2h_2	28℃_2h_3	28℃_48h_1	28℃_48h_2	28℃_48h_3	34℃_2h_1	34℃_2h_2	34℃_2h_3	34℃_48h_1	34℃_48h_2	34℃_48h_3	CV(%)
bactin1	A_15_P113966	NM_131031	bactin1	17.7537	17.599	17.5043	17.41	17.3891	17.4154	17.7873	17.6161	17.6112	17.0277	16.9776	17.0611	17.5753	17.4991	17.599	16.9018	17.1937	17.0923	1.59806
rpl7a	A_15_P108180	NM_200047	ribosomal protein L7a	18.4415	18.5298	18.3584	18.6116	18.5424	18.5	18.4415	18.4774	18.4563	18.4969	18.5298	18.5528	18.5501	18.4774	18.5298	18.4969	18.4774	18.4186	0.31713
tnnt3b	A_15_P111239	NM_181653	troponin T3b, skeletal, fast	18.2429	18.3919	18.2206	18.3381	18.1548	18.1695	18.2991	18.3278	18.2872	18.1334	18.1901	18.1338	18.2718	18.2784	18.2653	18.2991	18.2383	18.1981	0.401958
tnnt3b	A_15_P115653	NM_181653	troponin T3b, skeletal, fast	17.7391	17.956	17.7871	17.6276	17.4856	17.5538	17.5777	17.8137	17.7998	17.7213	17.6552	17.5287	17.8023	17.8823	17.7871	17.9201	17.5889	17.5778	0.800389
tpma	A_15_P382820	NM_131105	alpha-tropomyosin	16.97	17.2446	17.0736	16.9215	16.7116	16.8808	16.9312	17.0218	16.9967	17.0561	16.8433	16.7823	16.6621	17.0575	17.0736	17.1228	16.8862	16.9452	0.866194
tpma	A_15_P109860	NM_131105	alpha-tropomyosin	17.666	17.6073	17.5437	17.5124	17.4214	17.4413	17.6814	17.5918	17.6647	17.4403	17.4413	17.4279	17.6951	17.4807	17.5124	17.5864	17.3772	17.436	0.589025
tpt1	A_15_P101870	NM_198140	tumor protein, translationally-controlled 1	18.2558	18.2121	18.1044	18.1706	18.1666	18.1548	18.1343	18.1666	18.1426	18.2264	18.1548	18.204	18.1958	18.1762	18.1666	18.2057	18.1762	18.0947	0.22269
Shown are log2 transformed expression values.
CV: coefficient of variation (%) in gene expression among all treatments.

## Sheet: qPCR expression
Relative expression of candidate interal reference genes measured by qPCR
treatment	16℃_2h_1	16℃_2h_2	16℃_2h_3	16℃_48h_1	16℃_48h_2	16℃_48h_3	28℃_2h_1	28℃_2h_2	28℃_2h_3	28℃_48h_1	28℃_48h_2	28℃_48h_3	34℃_2h_1	34℃_2h_2	34℃_2h_3	34℃_48h_1	34℃_48h_2	34℃_48h_3
tpma	6510.77	6412.89	6789.87	8767.04	19411.4	7457.05	9583.65	18139.8	15980.7	10896.7	6968.15	9061.82	9056.01	8897.51	10550.1	9314.35	9193.84	6880.63
tpt1	1000.33	989.038	1023.45	1443.6	1430.66	1037.3	1470.18	1403.67	2418.34	1695.73	2413.77	1488.04	1165.78	1439.52	1209.68	1450.11	1826.91	1439.52
rp17a	973.237	969.978	1001.92	1285.77	2499.57	997.808	1307.42	1133.09	1283.9	1658.3	1481.55	1213.55	1265.23	1265.24	1281.68	1281.81	1258.92	2291.32
tnnt3b	48651.2	47981	49002.1	42683	54961	79652.5	50736.1	64438.7	60399.4	59951.1	49599.2	42774.3	45920.7	64489.8	50952	61900.9	33716.1	47915.5
actin1	8062	7976.29	10422.6	5878.87	6355.54	7842.27	8132.71	6703.89	9272.37	4717.76	3815.8	5001.68	6163.63	6781.35	6079.88	3383.67	3977.47	3903.72
group	1	1	1	2	2	2	3	3	3	4	4	4	5	5	5	6	6	6
Relative expression of genes were calculated using correspondiing amplification standard curves.

## Sheet: NormFinder analysis result
	Gene name	Stability value			Best gene	tnnt3b
	tpma	0.225972			Stability value	0.159115
	tpt1	0.235377
	rp17a	0.211615			Best combination of two genes	tpma and tnnt3b
	tnnt3b	0.159115			Stability value for best combination of two genes	0.144354
	actin1	0.301158
	Intragroup variation
	Group identifier	1	2	3	4	5	6
	tpma	3.77517e-05	0.138065	0.107334	0.0462463	0.0208682	0.0481909
	tpt1	9.70591e-05	0.0363518	0.0485733	0.101266	0.00235643	0.029131
	rp17a	4.39346e-06	0.110236	0.0240425	0.000383403	0.00378059	0.137321
	tnnt3b	0.000991604	0.196243	0.00758302	0.000383403	0.0182097	0.108588
	actin1	0.0178336	0.0810941	0.021778	0.0364996	0.000836545	0.00315063
	Intergroup variation
	Group identifier	1	2	3	4	5	6
	tpma	-0.221908	0.0688618	0.216208	-0.0548701	0.0191202	-0.027412
	tpt1	-0.203177	-0.162211	0.00584714	0.266394	-0.0963359	0.189483
	rp17a	-0.150119	0.0480332	-0.239923	0.104066	-0.0170139	0.254957
	tnnt3b	0.0676582	0.0224044	-0.0730144	-0.0254983	0.0349618	-0.0265117
	actin1	0.507546	0.0229119	0.090882	-0.290092	0.0592678	-0.390515
