# Supplementary material for: Transcriptomic Characterization of Temperature Stress Responses in Larval Zebrafish
Source: PLoS One. 2012 May 30;7(5):e37209. doi: 10.1371/journal.pone.0037209 (PMC3364249; doi:10.1371/journal.pone.0037209)
Supplement: Table S7 — Results of GO enrichment analysis. (XLS) [file pone.0037209.s011.xls]

## Sheet: Up-regulated genes
16℃-2h vs 28℃-2h up-regulated
	GOID	Ontology	Term	Number of genes in the list	Number of genes on microarray	p-value
	GO:0006355	biological_process	regulation of transcription, DNA-dependent	40	1163	6.241e-15
	GO:0009889	biological_process	regulation of biosynthetic process	41	1242	6.924e-15
	GO:0010468	biological_process	regulation of gene expression	41	1261	1.074e-14
	GO:0010556	biological_process	regulation of macromolecule biosynthetic process	41	1227	6.241e-15
	GO:0019219	biological_process	regulation of nucleobase-containing compound metabolic process	40	1242	3.297e-14
	GO:0019222	biological_process	regulation of metabolic process	41	1491	1.865e-12
	GO:0031323	biological_process	regulation of cellular metabolic process	41	1360	1.147e-13
	GO:0031326	biological_process	regulation of cellular biosynthetic process	41	1239	6.924e-15
	GO:0050789	biological_process	regulation of biological process	58	3471	4.944e-09
	GO:0050794	biological_process	regulation of cellular process	56	3316	7.52e-09
	GO:0051171	biological_process	regulation of nitrogen compound metabolic process	40	1243	3.297e-14
	GO:0051252	biological_process	regulation of RNA metabolic process	40	1171	6.793e-15
	GO:0060255	biological_process	regulation of macromolecule metabolic process	41	1383	1.898e-13
	GO:0065007	biological_process	biological regulation	60	3639	3.721e-09
	GO:0080090	biological_process	regulation of primary metabolic process	41	1411	3.513e-13
	GO:2000112	biological_process	regulation of cellular macromolecule biosynthetic process	41	1223	6.241e-15
	GO:2001141	biological_process	regulation of RNA biosynthetic process	40	1163	6.241e-15
	GO:0050896	biological_process	response to stimulus	28	2354	0.07674
	GO:0009607	biological_process	response to biotic stimulus	5	100	0.02859
	GO:0051704	biological_process	multi-organism process	5	91	0.02043
	GO:0051707	biological_process	response to other organism	5	86	0.0167
	GO:0006323	biological_process	DNA packaging	4	70	0.05425
	GO:0006334	biological_process	nucleosome assembly	4	57	0.02859
	GO:0031497	biological_process	chromatin assembly	4	57	0.02859
	GO:0034728	biological_process	nucleosome organization	4	57	0.02859
	GO:0065004	biological_process	protein-DNA complex assembly	4	57	0.02859
	GO:0071103	biological_process	DNA conformation change	4	77	0.07386
	GO:0071824	biological_process	protein-DNA complex subunit organization	4	57	0.02859
	GO:0009266	biological_process	response to temperature stimulus	3	32	0.0547
	GO:0009314	biological_process	response to radiation	4	79	0.07943
	GO:0009416	biological_process	response to light stimulus	4	74	0.06448
	GO:0006470	biological_process	protein dephosphorylation	5	137	0.09076
	GO:0006979	biological_process	response to oxidative stress	5	27	9.545e-05
	GO:0006950	biological_process	response to stress	13	479	0.001733
	GO:0007596	biological_process	blood coagulation	3	31	0.05282
	GO:0007599	biological_process	hemostasis	3	31	0.05282
	GO:0050817	biological_process	coagulation	3	31	0.05282
	GO:0050878	biological_process	regulation of body fluid levels	3	31	0.05282
	GO:0001558	biological_process	regulation of cell growth	4	63	0.04074
	GO:0040008	biological_process	regulation of growth	4	73	0.06199
	GO:0018106	biological_process	peptidyl-histidine phosphorylation	2	5	0.02462
	GO:0018202	biological_process	peptidyl-histidine modification	2	7	0.04476
	GO:0006000	biological_process	fructose metabolic process	3	9	0.001898
	GO:0006003	biological_process	fructose 2,6-bisphosphate metabolic process	3	9	0.001898
	GO:0005622	cellular_component	intracellular	71	6193	0.0001263
	GO:0005623	cellular_component	cell	83	8890	0.01705
	GO:0005634	cellular_component	nucleus	47	2556	2.198e-08
	GO:0043226	cellular_component	organelle	53	4293	0.0004926
	GO:0043227	cellular_component	membrane-bounded organelle	50	3571	3.043e-05
	GO:0043229	cellular_component	intracellular organelle	53	4290	0.0004926
	GO:0043231	cellular_component	intracellular membrane-bounded organelle	50	3570	3.043e-05
	GO:0044424	cellular_component	intracellular part	58	5224	0.002812
	GO:0044464	cellular_component	cell part	83	8890	0.01705
	GO:0000786	cellular_component	nucleosome	4	46	0.01532
	GO:0032993	cellular_component	protein-DNA complex	4	50	0.01989
	GO:0003676	molecular_function	nucleic acid binding	48	2821	1.705e-07
	GO:0003677	molecular_function	DNA binding	39	1584	2.534e-10
	GO:0005488	molecular_function	binding	102	9123	6.918e-07
	GO:0003690	molecular_function	double-stranded DNA binding	4	18	0.0005273
	GO:0043566	molecular_function	structure-specific DNA binding	4	33	0.004389
	GO:0001071	molecular_function	nucleic acid binding transcription factor activity	33	957	1.865e-12
	GO:0003700	molecular_function	sequence-specific DNA binding transcription factor activity	33	957	1.865e-12
	GO:0043565	molecular_function	sequence-specific DNA binding	30	755	9.798e-13
	GO:0005515	molecular_function	protein binding	42	2748	3.269e-05
	GO:0046983	molecular_function	protein dimerization activity	19	123	9.013e-18
	GO:0003707	molecular_function	steroid hormone receptor activity	7	104	0.0005635
	GO:0004871	molecular_function	signal transducer activity	18	945	0.004221
	GO:0060089	molecular_function	molecular transducer activity	18	945	0.004221
	GO:0000981	molecular_function	sequence-specific DNA binding RNA polymerase II transcription factor activity	7	103	0.0005414
	GO:0004879	molecular_function	ligand-activated sequence-specific DNA binding RNA polymerase II transcription factor activity	7	103	0.0005414
	GO:0004887	molecular_function	thyroid hormone receptor activity	5	13	1.979e-06
	GO:0004725	molecular_function	protein tyrosine phosphatase activity	5	118	0.05314
	GO:0008138	molecular_function	protein tyrosine/serine/threonine phosphatase activity	5	52	0.00192
	GO:0017017	molecular_function	MAP kinase tyrosine/serine/threonine phosphatase activity	5	14	2.865e-06
	GO:0033549	molecular_function	MAP kinase phosphatase activity	5	14	2.865e-06
	GO:0004601	molecular_function	peroxidase activity	4	22	0.001094
	GO:0016209	molecular_function	antioxidant activity	4	40	0.008991
	GO:0016684	molecular_function	oxidoreductase activity, acting on peroxide as acceptor	4	22	0.001094
	GO:0004731	molecular_function	purine-nucleoside phosphorylase activity	3	10	0.002562
	GO:0046982	molecular_function	protein heterodimerization activity	4	28	0.002562
	GO:0005520	molecular_function	insulin-like growth factor binding	4	32	0.004088
	GO:0019838	molecular_function	growth factor binding	4	40	0.008991
	GO:0000155	molecular_function	two-component sensor activity	2	8	0.05425
	GO:0004673	molecular_function	protein histidine kinase activity	2	8	0.05425
	GO:0016775	molecular_function	phosphotransferase activity, nitrogenous group as acceptor	2	10	0.07957
	GO:0003873	molecular_function	6-phosphofructo-2-kinase activity	3	9	0.001898
	GO:0008443	molecular_function	phosphofructokinase activity	3	13	0.005157
	GO:0019200	molecular_function	carbohydrate kinase activity	3	23	0.02565
	GO:0031994	molecular_function	insulin-like growth factor I binding	2	6	0.03294
	GO:0031995	molecular_function	insulin-like growth factor II binding	2	5	0.02462
16℃-48h vs 28℃-48h up-regulated
	GOID	Ontology	Term	Number of genes in the list	Number of genes on microarray	p-value
	GO:0008152	biological_process	metabolic process	271	4894	2.217e-22
	GO:0009056	biological_process	catabolic process	38	573	0.0006443
	GO:0009987	biological_process	cellular process	312	7115	1.965e-11
	GO:0044237	biological_process	cellular metabolic process	195	3581	1.535e-14
	GO:0019538	biological_process	protein metabolic process	120	2209	3.31e-08
	GO:0043170	biological_process	macromolecule metabolic process	176	2966	2.112e-16
	GO:0044238	biological_process	primary metabolic process	220	3891	1.627e-18
	GO:0044260	biological_process	cellular macromolecule metabolic process	143	2536	3.426e-11
	GO:0044267	biological_process	cellular protein metabolic process	90	1819	0.0002228
	GO:0006508	biological_process	proteolysis	43	633	0.000103
	GO:0009058	biological_process	biosynthetic process	57	1274	0.09796
	GO:0006139	biological_process	nucleobase-containing compound metabolic process	72	1091	8.837e-08
	GO:0006807	biological_process	nitrogen compound metabolic process	85	1355	2.949e-08
	GO:0034641	biological_process	cellular nitrogen compound metabolic process	81	1312	1.494e-07
	GO:0090304	biological_process	nucleic acid metabolic process	54	749	6.734e-07
	GO:0006810	biological_process	transport	72	1686	0.08932
	GO:0050865	biological_process	regulation of cell activation	4	7	0.004326
	GO:0010467	biological_process	gene expression	52	739	2.719e-06
	GO:0016070	biological_process	RNA metabolic process	39	426	2.126e-07
	GO:0006873	biological_process	cellular ion homeostasis	9	70	0.02867
	GO:0006875	biological_process	cellular metal ion homeostasis	9	51	0.002866
	GO:0019725	biological_process	cellular homeostasis	20	166	3.096e-05
	GO:0030003	biological_process	cellular cation homeostasis	9	53	0.003909
	GO:0042592	biological_process	homeostatic process	21	225	0.0006714
	GO:0050801	biological_process	ion homeostasis	9	86	0.08893
	GO:0055065	biological_process	metal ion homeostasis	9	51	0.002866
	GO:0055080	biological_process	cation homeostasis	9	68	0.02338
	GO:0055082	biological_process	cellular chemical homeostasis	9	75	0.0424
	GO:0065008	biological_process	regulation of biological quality	25	388	0.0316
	GO:0055114	biological_process	oxidation-reduction process	36	688	0.07419
	GO:0006396	biological_process	RNA processing	33	284	1.38e-08
	GO:0006397	biological_process	mRNA processing	14	131	0.005707
	GO:0016071	biological_process	mRNA metabolic process	14	144	0.01446
	GO:0045454	biological_process	cell redox homeostasis	11	89	0.009811
	GO:0008104	biological_process	protein localization	28	485	0.06739
	GO:0015031	biological_process	protein transport	28	442	0.02012
	GO:0033036	biological_process	macromolecule localization	33	555	0.01838
	GO:0045184	biological_process	establishment of protein localization	28	442	0.02012
	GO:0009057	biological_process	macromolecule catabolic process	29	328	4.593e-05
	GO:0019941	biological_process	modification-dependent protein catabolic process	18	244	0.0424
	GO:0030163	biological_process	protein catabolic process	24	279	0.0006023
	GO:0043632	biological_process	modification-dependent macromolecule catabolic process	18	244	0.0424
	GO:0044257	biological_process	cellular protein catabolic process	19	259	0.03406
	GO:0044265	biological_process	cellular macromolecule catabolic process	20	289	0.04663
	GO:0051603	biological_process	proteolysis involved in cellular protein catabolic process	19	259	0.03406
	GO:0051246	biological_process	regulation of protein metabolic process	15	172	0.02534
	GO:0006511	biological_process	ubiquitin-dependent protein catabolic process	11	87	0.008135
	GO:0006457	biological_process	protein folding	18	164	0.0003625
	GO:0006403	biological_process	RNA localization	6	40	0.08932
	GO:0015931	biological_process	nucleobase-containing compound transport	6	40	0.08932
	GO:0050657	biological_process	nucleic acid transport	6	40	0.08932
	GO:0050658	biological_process	RNA transport	6	40	0.08932
	GO:0051236	biological_process	establishment of RNA localization	6	40	0.08932
	GO:0017157	biological_process	regulation of exocytosis	3	6	0.05551
	GO:0051046	biological_process	regulation of secretion	3	7	0.08285
	GO:0060341	biological_process	regulation of cellular localization	3	7	0.08285
	GO:0005622	cellular_component	intracellular	311	6193	1.528e-19
	GO:0005623	cellular_component	cell	327	6883	4.144e-17
	GO:0005737	cellular_component	cytoplasm	116	2560	0.0004425
	GO:0005783	cellular_component	endoplasmic reticulum	25	283	0.0002479
	GO:0043226	cellular_component	organelle	197	4293	6.026e-08
	GO:0043227	cellular_component	membrane-bounded organelle	173	3571	1.913e-08
	GO:0043229	cellular_component	intracellular organelle	197	4290	5.902e-08
	GO:0043231	cellular_component	intracellular membrane-bounded organelle	173	3570	1.913e-08
	GO:0044424	cellular_component	intracellular part	264	5224	2.055e-16
	GO:0044444	cellular_component	cytoplasmic part	70	1546	0.03246
	GO:0044464	cellular_component	cell part	327	6883	4.144e-17
	GO:0005634	cellular_component	nucleus	123	2556	1.519e-05
	GO:0030529	cellular_component	ribonucleoprotein complex	27	417	0.01886
	GO:0032991	cellular_component	macromolecular complex	89	1578	1.326e-06
	GO:0043234	cellular_component	protein complex	60	1118	0.001181
	GO:0000502	cellular_component	proteasome complex	23	62	1.075e-16
	GO:0005838	cellular_component	proteasome regulatory particle	3	6	0.05551
	GO:0022624	cellular_component	proteasome accessory complex	7	11	1.927e-06
	GO:0005923	cellular_component	tight junction	7	54	0.08928
	GO:0016327	cellular_component	apicolateral plasma membrane	7	54	0.08928
	GO:0043296	cellular_component	apical junction complex	7	54	0.08928
	GO:0070160	cellular_component	occluding junction	7	54	0.08928
	GO:0008537	cellular_component	proteasome activator complex	4	5	0.0006941
	GO:0003824	molecular_function	catalytic activity	286	5103	1.056e-24
	GO:0016787	molecular_function	hydrolase activity	128	1926	5.195e-15
	GO:0000166	molecular_function	nucleotide binding	133	2300	4.218e-11
	GO:0005488	molecular_function	binding	434	9123	7.168e-25
	GO:0036094	molecular_function	small molecule binding	138	2422	4.218e-11
	GO:0043167	molecular_function	ion binding	136	3041	0.0001347
	GO:0043169	molecular_function	cation binding	136	3040	0.0001347
	GO:0046872	molecular_function	metal ion binding	134	3004	0.0001729
	GO:0016740	molecular_function	transferase activity	90	1787	0.0001243
	GO:0005515	molecular_function	protein binding	112	2748	0.03432
	GO:0005524	molecular_function	ATP binding	74	1346	5.785e-05
	GO:0017076	molecular_function	purine nucleotide binding	102	1848	3.458e-07
	GO:0030554	molecular_function	adenyl nucleotide binding	75	1352	3.592e-05
	GO:0032553	molecular_function	ribonucleotide binding	101	1846	6.076e-07
	GO:0032555	molecular_function	purine ribonucleotide binding	101	1846	6.076e-07
	GO:0032559	molecular_function	adenyl ribonucleotide binding	74	1351	6.533e-05
	GO:0035639	molecular_function	purine ribonucleoside triphosphate binding	101	1837	4.998e-07
	GO:0046914	molecular_function	transition metal ion binding	108	2172	2.093e-05
	GO:0004175	molecular_function	endopeptidase activity	27	317	0.000198
	GO:0008233	molecular_function	peptidase activity	37	485	4.46e-05
	GO:0070011	molecular_function	peptidase activity, acting on L-amino acid peptides	33	454	0.0004283
	GO:0003676	molecular_function	nucleic acid binding	149	2821	1.303e-09
	GO:0003723	molecular_function	RNA binding	41	492	1.041e-06
	GO:0008270	molecular_function	zinc ion binding	82	1777	0.006546
	GO:0004222	molecular_function	metalloendopeptidase activity	9	62	0.01276
	GO:0008237	molecular_function	metallopeptidase activity	11	118	0.07868
	GO:0005525	molecular_function	GTP binding	28	500	0.08893
	GO:0019001	molecular_function	guanyl nucleotide binding	28	505	0.09346
	GO:0032561	molecular_function	guanyl ribonucleotide binding	28	504	0.09132
	GO:0016462	molecular_function	pyrophosphatase activity	44	617	2.424e-05
	GO:0016817	molecular_function	hydrolase activity, acting on acid anhydrides	44	625	3.253e-05
	GO:0016818	molecular_function	hydrolase activity, acting on acid anhydrides, in phosphorus-containing anhydrides	44	620	2.716e-05
	GO:0017111	molecular_function	nucleoside-triphosphatase activity	42	607	8.802e-05
	GO:0016853	molecular_function	isomerase activity	13	138	0.03089
	GO:0016860	molecular_function	intramolecular oxidoreductase activity	5	26	0.08285
	GO:0016491	molecular_function	oxidoreductase activity	41	789	0.0424
	GO:0004386	molecular_function	helicase activity	13	133	0.02232
	GO:0008026	molecular_function	ATP-dependent helicase activity	11	93	0.0142
	GO:0016887	molecular_function	ATPase activity	21	262	0.006119
	GO:0042623	molecular_function	ATPase activity, coupled	19	229	0.008582
	GO:0070035	molecular_function	purine NTP-dependent helicase activity	11	93	0.0142
	GO:0004221	molecular_function	ubiquitin thiolesterase activity	6	35	0.05714
	GO:0016790	molecular_function	thiolester hydrolase activity	8	53	0.02164
	GO:0051082	molecular_function	unfolded protein binding	10	96	0.05976
	GO:0000175	molecular_function	3'-5'-exoribonuclease activity	4	10	0.02016
	GO:0004532	molecular_function	exoribonuclease activity	4	12	0.03886
	GO:0008408	molecular_function	3'-5' exonuclease activity	4	13	0.05141
	GO:0016796	molecular_function	exonuclease activity, active with either ribo- or deoxyribonucleic acids and producing 5'-phosphomonoesters	4	13	0.05141
	GO:0016896	molecular_function	exoribonuclease activity, producing 5'-phosphomonoesters	4	12	0.03886
	GO:0046983	molecular_function	protein dimerization activity	12	123	0.03598
	GO:0016810	molecular_function	hydrolase activity, acting on carbon-nitrogen (but not peptide) bonds	10	99	0.07419
	GO:0016779	molecular_function	nucleotidyltransferase activity	11	103	0.03089
	GO:0004298	molecular_function	threonine-type endopeptidase activity	5	27	0.08932
	GO:0070003	molecular_function	threonine-type peptidase activity	5	27	0.08932
	GO:0003899	molecular_function	DNA-directed RNA polymerase activity	6	37	0.07419
	GO:0034062	molecular_function	RNA polymerase activity	6	37	0.07419
	GO:0004359	molecular_function	glutaminase activity	3	6	0.05551
34℃-2h vs 28℃-2h up-regulated
	GOID	Ontology	Term	Number of genes in the list	Number of genes on microarray	p-value
	GO:0006950	biological_process	response to stress	29	479	1.323e-14
	GO:0050896	biological_process	response to stimulus	36	2354	0.005592
	GO:0009266	biological_process	response to temperature stimulus	8	32	3.728e-08
	GO:0009408	biological_process	response to heat	8	20	7.861e-10
	GO:0009628	biological_process	response to abiotic stimulus	9	138	0.000172
	GO:0006457	biological_process	protein folding	30	164	2.95e-29
	GO:0008152	biological_process	metabolic process	57	4896	0.04818
	GO:0009987	biological_process	cellular process	78	7123	0.0334
	GO:0019538	biological_process	protein metabolic process	39	2209	0.000172
	GO:0043170	biological_process	macromolecule metabolic process	45	2968	0.001059
	GO:0044237	biological_process	cellular metabolic process	47	3591	0.0147
	GO:0044238	biological_process	primary metabolic process	48	3893	0.04142
	GO:0044260	biological_process	cellular macromolecule metabolic process	44	2538	6.804e-05
	GO:0044267	biological_process	cellular protein metabolic process	38	1819	7.802e-06
	GO:0006986	biological_process	response to unfolded protein	2	5	0.03227
	GO:0035966	biological_process	response to topologically incorrect protein	2	5	0.03227
	GO:0006458	biological_process	'de novo' protein folding	3	5	0.0004784
	GO:0051084	biological_process	'de novo' posttranslational protein folding	3	5	0.0004784
	GO:0051085	biological_process	chaperone mediated protein folding requiring cofactor	3	5	0.0004784
	GO:0061077	biological_process	chaperone-mediated protein folding	3	5	0.0004784
	GO:0006996	biological_process	organelle organization	15	554	0.002518
	GO:0016043	biological_process	cellular component organization	16	892	0.0757
	GO:0030239	biological_process	myofibril assembly	4	56	0.04679
	GO:0031032	biological_process	actomyosin structure organization	4	60	0.05666
	GO:0071840	biological_process	cellular component organization or biogenesis	17	966	0.06773
	GO:0071841	biological_process	cellular component organization or biogenesis at cellular level	16	853	0.05195
	GO:0071842	biological_process	cellular component organization at cellular level	15	788	0.06025
	GO:0030241	biological_process	skeletal muscle myosin thick filament assembly	2	7	0.05666
	GO:0031033	biological_process	myosin filament organization	2	7	0.05666
	GO:0031034	biological_process	myosin filament assembly	2	7	0.05666
	GO:0071688	biological_process	striated muscle myosin thick filament assembly	2	7	0.05666
	GO:0008219	biological_process	cell death	5	116	0.09237
	GO:0016265	biological_process	death	5	116	0.09237
	GO:0006325	biological_process	chromatin organization	8	193	0.009449
	GO:0051276	biological_process	chromosome organization	9	228	0.005611
	GO:0019725	biological_process	cellular homeostasis	8	166	0.003734
	GO:0042592	biological_process	homeostatic process	9	225	0.005231
	GO:0045454	biological_process	cell redox homeostasis	6	89	0.005225
	GO:0043122	biological_process	regulation of I-kappaB kinase/NF-kappaB cascade	2	9	0.09237
	GO:0043123	biological_process	positive regulation of I-kappaB kinase/NF-kappaB cascade	2	6	0.04554
	GO:0005622	cellular_component	intracellular	71	6193	0.01854
	GO:0005737	cellular_component	cytoplasm	47	2560	7.851e-06
	GO:0044424	cellular_component	intracellular part	68	5224	0.0009048
	GO:0030016	cellular_component	myofibril	3	24	0.04296
	GO:0030017	cellular_component	sarcomere	3	17	0.01687
	GO:0030018	cellular_component	Z disc	3	14	0.01048
	GO:0031674	cellular_component	I band	3	14	0.01048
	GO:0043226	cellular_component	organelle	55	4293	0.008243
	GO:0043229	cellular_component	intracellular organelle	55	4290	0.008216
	GO:0043292	cellular_component	contractile fiber	3	25	0.04679
	GO:0044422	cellular_component	organelle part	27	1159	6.804e-05
	GO:0044444	cellular_component	cytoplasmic part	36	1546	1.45e-06
	GO:0044449	cellular_component	contractile fiber part	3	25	0.04679
	GO:0044446	cellular_component	intracellular organelle part	24	1147	0.001072
	GO:0043227	cellular_component	membrane-bounded organelle	50	3571	0.002307
	GO:0043231	cellular_component	intracellular membrane-bounded organelle	50	3570	0.002307
	GO:0031974	cellular_component	membrane-enclosed lumen	10	225	0.001059
	GO:0043233	cellular_component	organelle lumen	10	216	0.0007889
	GO:0070013	cellular_component	intracellular organelle lumen	10	216	0.0007889
	GO:0005783	cellular_component	endoplasmic reticulum	22	283	5.76e-13
	GO:0044432	cellular_component	endoplasmic reticulum part	6	49	0.000246
	GO:0005759	cellular_component	mitochondrial matrix	3	17	0.01687
	GO:0000166	molecular_function	nucleotide binding	35	2300	0.007551
	GO:0005488	molecular_function	binding	109	9123	6.804e-05
	GO:0036094	molecular_function	small molecule binding	42	2422	0.0001121
	GO:0005524	molecular_function	ATP binding	30	1346	5.483e-05
	GO:0017076	molecular_function	purine nucleotide binding	32	1848	0.001612
	GO:0030554	molecular_function	adenyl nucleotide binding	30	1352	5.496e-05
	GO:0032553	molecular_function	ribonucleotide binding	32	1846	0.001607
	GO:0032555	molecular_function	purine ribonucleotide binding	32	1846	0.001607
	GO:0032559	molecular_function	adenyl ribonucleotide binding	30	1351	5.496e-05
	GO:0035639	molecular_function	purine ribonucleoside triphosphate binding	32	1837	0.001516
	GO:0005515	molecular_function	protein binding	50	2748	3.983e-06
	GO:0051082	molecular_function	unfolded protein binding	20	96	3.583e-20
	GO:0004656	molecular_function	procollagen-proline 4-dioxygenase activity	5	5	1.049e-08
	GO:0016705	molecular_function	oxidoreductase activity, acting on paired donors, with incorporation or reduction of molecular oxygen	6	105	0.01091
	GO:0016706	molecular_function	oxidoreductase activity, acting on paired donors, with incorporation or reduction of molecular oxygen, 2-oxoglutarate as one donor, and incorporation of one atom each of oxygen into both donors	5	14	1.19e-05
	GO:0019798	molecular_function	procollagen-proline dioxygenase activity	5	5	1.049e-08
	GO:0031543	molecular_function	peptidyl-proline dioxygenase activity	5	5	1.049e-08
	GO:0031545	molecular_function	peptidyl-proline 4-dioxygenase activity	5	5	1.049e-08
	GO:0051213	molecular_function	dioxygenase activity	6	41	0.0001004
	GO:0005506	molecular_function	iron ion binding	13	315	0.0001635
	GO:0016701	molecular_function	oxidoreductase activity, acting on single donors with incorporation of molecular oxygen	6	38	6.804e-05
	GO:0016702	molecular_function	oxidoreductase activity, acting on single donors with incorporation of molecular oxygen, incorporation of two atoms of oxygen	6	37	6.804e-05
	GO:0019842	molecular_function	vitamin binding	7	118	0.003046
	GO:0031406	molecular_function	carboxylic acid binding	6	66	0.001129
	GO:0031418	molecular_function	L-ascorbic acid binding	6	20	2.108e-06
	GO:0031072	molecular_function	heat shock protein binding	7	63	8.335e-05
	GO:0016853	molecular_function	isomerase activity	6	138	0.03933
	GO:0016860	molecular_function	intramolecular oxidoreductase activity	3	26	0.05119
34℃-48h vs 28℃-48h up-regulated
	GOID	Ontology	Term	Number of genes in the list	Number of genes on microarray	p-value
	GO:0050896	biological_process	response to stimulus	84	2354	1.753e-10
	GO:0006508	biological_process	proteolysis	22	633	0.02488
	GO:0008152	biological_process	metabolic process	119	4896	2.214e-05
	GO:0019538	biological_process	protein metabolic process	59	2209	0.001883
	GO:0043170	biological_process	macromolecule metabolic process	71	2968	0.00697
	GO:0044238	biological_process	primary metabolic process	92	3893	0.001086
	GO:0016052	biological_process	carbohydrate catabolic process	7	96	0.05356
	GO:0000270	biological_process	peptidoglycan metabolic process	4	8	0.0006954
	GO:0000272	biological_process	polysaccharide catabolic process	5	16	0.000671
	GO:0005976	biological_process	polysaccharide metabolic process	7	52	0.001883
	GO:0006022	biological_process	aminoglycan metabolic process	5	36	0.02007
	GO:0006026	biological_process	aminoglycan catabolic process	5	16	0.000671
	GO:0006027	biological_process	glycosaminoglycan catabolic process	4	8	0.0006954
	GO:0009253	biological_process	peptidoglycan catabolic process	4	8	0.0006954
	GO:0009308	biological_process	amine metabolic process	15	266	0.001971
	GO:0030203	biological_process	glycosaminoglycan metabolic process	4	28	0.06133
	GO:0042221	biological_process	response to chemical stimulus	18	388	0.003714
	GO:0006950	biological_process	response to stress	38	479	1.474e-13
	GO:0055114	biological_process	oxidation-reduction process	27	688	0.001086
	GO:0001736	biological_process	establishment of planar polarity	3	7	0.01251
	GO:0001738	biological_process	morphogenesis of a polarized epithelium	3	11	0.04666
	GO:0007164	biological_process	establishment of tissue polarity	3	7	0.01251
	GO:0006935	biological_process	chemotaxis	6	73	0.06133
	GO:0042330	biological_process	taxis	6	73	0.06133
	GO:0030010	biological_process	establishment of cell polarity	3	13	0.06606
	GO:0008219	biological_process	cell death	8	116	0.03423
	GO:0016265	biological_process	death	8	116	0.03423
	GO:0016042	biological_process	lipid catabolic process	6	56	0.02007
	GO:0009607	biological_process	response to biotic stimulus	15	100	2.149e-08
	GO:0009617	biological_process	response to bacterium	14	71	2.876e-09
	GO:0051704	biological_process	multi-organism process	15	91	5.916e-09
	GO:0051707	biological_process	response to other organism	15	86	2.876e-09
	GO:0040008	biological_process	regulation of growth	6	73	0.06133
	GO:0002376	biological_process	immune system process	18	302	0.000235
	GO:0009266	biological_process	response to temperature stimulus	4	32	0.08656
	GO:0009408	biological_process	response to heat	4	20	0.02059
	GO:0030595	biological_process	leukocyte chemotaxis	3	6	0.007811
	GO:0050900	biological_process	leukocyte migration	3	6	0.007811
	GO:0060326	biological_process	cell chemotaxis	3	6	0.007811
	GO:0006952	biological_process	defense response	6	73	0.06133
	GO:0042742	biological_process	defense response to bacterium	4	23	0.03423
	GO:0006955	biological_process	immune response	12	152	0.0006954
	GO:0006457	biological_process	protein folding	15	164	1.59e-05
	GO:0042060	biological_process	wound healing	6	83	0.09853
	GO:0006879	biological_process	cellular iron ion homeostasis	4	26	0.05137
	GO:0055072	biological_process	iron ion homeostasis	4	26	0.05137
	GO:0005576	cellular_component	extracellular region	26	515	4.066e-05
	GO:0005102	molecular_function	receptor binding	16	299	0.001971
	GO:0005488	molecular_function	binding	194	9123	1.59e-05
	GO:0005515	molecular_function	protein binding	84	2748	2.334e-07
	GO:0003824	molecular_function	catalytic activity	116	5103	0.0005564
	GO:0004175	molecular_function	endopeptidase activity	21	317	1.126e-05
	GO:0008233	molecular_function	peptidase activity	24	485	0.0001216
	GO:0016787	molecular_function	hydrolase activity	47	1926	0.0564
	GO:0070011	molecular_function	peptidase activity, acting on L-amino acid peptides	24	454	5.177e-05
	GO:0046914	molecular_function	transition metal ion binding	51	2172	0.07238
	GO:0016491	molecular_function	oxidoreductase activity	30	789	0.0007234
	GO:0005506	molecular_function	iron ion binding	17	315	0.001086
	GO:0016810	molecular_function	hydrolase activity, acting on carbon-nitrogen (but not peptide) bonds	7	103	0.06984
	GO:0016811	molecular_function	hydrolase activity, acting on carbon-nitrogen (but not peptide) bonds, in linear amides	5	47	0.05585
	GO:0005179	molecular_function	hormone activity	7	71	0.01094
	GO:0004252	molecular_function	serine-type endopeptidase activity	10	121	0.002108
	GO:0008236	molecular_function	serine-type peptidase activity	10	137	0.005533
	GO:0017171	molecular_function	serine hydrolase activity	10	137	0.005533
	GO:0004857	molecular_function	enzyme inhibitor activity	11	131	0.0009087
	GO:0004866	molecular_function	endopeptidase inhibitor activity	9	87	0.001086
	GO:0030414	molecular_function	peptidase inhibitor activity	10	98	0.0005564
	GO:0061134	molecular_function	peptidase regulator activity	10	98	0.0005564
	GO:0061135	molecular_function	endopeptidase regulator activity	9	87	0.001086
	GO:0005520	molecular_function	insulin-like growth factor binding	5	32	0.01212
	GO:0019838	molecular_function	growth factor binding	6	40	0.003786
	GO:0046983	molecular_function	protein dimerization activity	12	123	0.0001109
	GO:0008234	molecular_function	cysteine-type peptidase activity	10	132	0.004169
	GO:0004197	molecular_function	cysteine-type endopeptidase activity	7	80	0.02059
	GO:0004497	molecular_function	monooxygenase activity	8	142	0.08812
	GO:0016705	molecular_function	oxidoreductase activity, acting on paired donors, with incorporation or reduction of molecular oxygen	9	105	0.003989
	GO:0005507	molecular_function	copper ion binding	6	34	0.001685
	GO:0030246	molecular_function	carbohydrate binding	9	122	0.01094
	GO:0031994	molecular_function	insulin-like growth factor I binding	4	6	0.0002167
	GO:0031995	molecular_function	insulin-like growth factor II binding	4	5	8.305e-05
	GO:0019842	molecular_function	vitamin binding	8	118	0.03793
	GO:0031418	molecular_function	L-ascorbic acid binding	5	20	0.001597
	GO:0004867	molecular_function	serine-type endopeptidase inhibitor activity	6	52	0.01346
	GO:0051082	molecular_function	unfolded protein binding	12	96	1.327e-05
	GO:0031072	molecular_function	heat shock protein binding	6	63	0.03423
	GO:0004656	molecular_function	procollagen-proline 4-dioxygenase activity	4	5	8.305e-05
	GO:0016706	molecular_function	oxidoreductase activity, acting on paired donors, with incorporation or reduction of molecular oxygen, 2-oxoglutarate as one donor, and incorporation of one atom each of oxygen into both donors	4	14	0.005669
	GO:0019798	molecular_function	procollagen-proline dioxygenase activity	4	5	8.305e-05
	GO:0031543	molecular_function	peptidyl-proline dioxygenase activity	4	5	8.305e-05
	GO:0031545	molecular_function	peptidyl-proline 4-dioxygenase activity	4	5	8.305e-05

## Sheet: Down-regulated genes
16℃-2h vs 28℃-2h down-regulated
	GOID	Ontology	Term	Number of genes in the list	Number of genes on microarray	p-value
	GO:0042491	biological_process	auditory receptor cell differentiation	2	11	0.02677
	GO:0007420	biological_process	brain development	7	248	0.001331
	GO:0030154	biological_process	cell differentiation	10	728	0.002993
	GO:0001709	biological_process	cell fate determination	2	9	0.01865
	GO:0006725	biological_process	cellular aromatic compound metabolic process	3	91	0.08648
	GO:0048869	biological_process	cellular developmental process	10	764	0.004302
	GO:0007417	biological_process	central nervous system development	7	317	0.002886
	GO:0021954	biological_process	central nervous system neuron development	2	21	0.07324
	GO:0021953	biological_process	central nervous system neuron differentiation	4	63	0.002886
	GO:0021545	biological_process	cranial nerve development	2	24	0.08648
	GO:0030900	biological_process	forebrain development	5	79	0.0009919
	GO:0021872	biological_process	forebrain generation of neurons	4	15	3.185e-05
	GO:0021884	biological_process	forebrain neuron development	2	7	0.01287
	GO:0021879	biological_process	forebrain neuron differentiation	4	15	3.185e-05
	GO:0048699	biological_process	generation of neurons	7	303	0.002689
	GO:0021575	biological_process	hindbrain morphogenesis	3	19	0.002679
	GO:0060113	biological_process	inner ear receptor cell differentiation	2	15	0.04332
	GO:0048882	biological_process	lateral line development	2	23	0.08275
	GO:0048892	biological_process	lateral line nerve development	2	11	0.02677
	GO:0042490	biological_process	mechanoreceptor differentiation	2	24	0.08648
	GO:0048881	biological_process	mechanosensory lateral line system development	2	23	0.08275
	GO:0010721	biological_process	negative regulation of cell development	3	18	0.002411
	GO:0045596	biological_process	negative regulation of cell differentiation	3	44	0.01865
	GO:0051093	biological_process	negative regulation of developmental process	3	73	0.05383
	GO:0050768	biological_process	negative regulation of neurogenesis	3	18	0.002411
	GO:0021675	biological_process	nerve development	2	26	0.09806
	GO:0007399	biological_process	nervous system development	10	566	0.00112
	GO:0022008	biological_process	neurogenesis	7	319	0.002886
	GO:0048884	biological_process	neuromast development	2	15	0.04332
	GO:0030182	biological_process	neuron differentiation	6	254	0.00626
	GO:0048709	biological_process	oligodendrocyte differentiation	2	20	0.06779
	GO:0048935	biological_process	peripheral nervous system neuron development	2	9	0.01865
	GO:0048934	biological_process	peripheral nervous system neuron differentiation	2	9	0.01865
	GO:0048918	biological_process	posterior lateral line nerve development	2	9	0.01865
	GO:0048915	biological_process	posterior lateral line system development	2	23	0.08275
	GO:0060284	biological_process	regulation of cell development	3	70	0.04871
	GO:0051960	biological_process	regulation of nervous system development	3	70	0.04871
	GO:0050767	biological_process	regulation of neurogenesis	3	67	0.04594
	GO:0009410	biological_process	response to xenobiotic stimulus	3	28	0.005696
	GO:0008519	molecular_function	ammonium transmembrane transporter activity	2	12	0.03034
	GO:0003913	molecular_function	DNA photolyase activity	2	16	0.04713
	GO:0015101	molecular_function	organic cation transmembrane transporter activity	2	12	0.03034
	GO:0016712	molecular_function	oxidoreductase activity, acting on paired donors, with incorporation or reduction of molecular oxygen, reduced flavin or flavoprotein as one donor, and incorporation of one atom of oxygen	3	32	0.007923
	GO:0005164	molecular_function	tumor necrosis factor receptor binding	2	14	0.03954
	GO:0032813	molecular_function	tumor necrosis factor receptor superfamily binding	2	14	0.03954
16℃-48h vs 28℃-48h down-regulated
	GOID	Ontology	Term	Number of genes in the list	Number of genes on microarray	p-value
	GO:0016052	biological_process	carbohydrate catabolic process	11	96	0.04928
	GO:0044262	biological_process	cellular carbohydrate metabolic process	19	249	0.05933
	GO:0044275	biological_process	cellular carbohydrate catabolic process	10	80	0.04928
	GO:0046164	biological_process	alcohol catabolic process	10	80	0.04928
	GO:0061061	biological_process	muscle structure development	15	167	0.05178
	GO:0014706	biological_process	striated muscle tissue development	13	79	0.001146
	GO:0048738	biological_process	cardiac muscle tissue development	7	35	0.02951
	GO:0060537	biological_process	muscle tissue development	13	79	0.001146
	GO:0055003	biological_process	cardiac myofibril assembly	4	10	0.05188
	GO:0055005	biological_process	ventricular cardiac myofibril development	4	5	0.004587
	GO:0055012	biological_process	ventricular cardiac muscle cell differentiation	4	11	0.07508
	GO:0055015	biological_process	ventricular cardiac muscle cell development	4	6	0.0111
	GO:0019751	biological_process	polyol metabolic process	6	21	0.01644
	GO:0046174	biological_process	polyol catabolic process	4	7	0.01644
	GO:0006071	biological_process	glycerol metabolic process	5	20	0.07686
	GO:0019400	biological_process	alditol metabolic process	5	20	0.07686
	GO:0005856	cellular_component	cytoskeleton	29	478	0.07686
	GO:0005882	cellular_component	intermediate filament	12	70	0.00136
	GO:0045111	cellular_component	intermediate filament cytoskeleton	12	70	0.00136
	GO:0005488	molecular_function	binding	326	9123	0.02249
	GO:0003824	molecular_function	catalytic activity	208	5103	0.001146
	GO:0043167	molecular_function	ion binding	128	3041	0.01644
	GO:0043169	molecular_function	cation binding	128	3040	0.01644
	GO:0046872	molecular_function	metal ion binding	126	3004	0.02122
	GO:0005215	molecular_function	transporter activity	52	948	0.01388
	GO:0008168	molecular_function	methyltransferase activity	18	187	0.0111
	GO:0016741	molecular_function	transferase activity, transferring one-carbon groups	18	193	0.01481
	GO:0008276	molecular_function	protein methyltransferase activity	10	52	0.003327
	GO:0004719	molecular_function	protein-L-isoaspartate (D-aspartate) O-methyltransferase activity	4	7	0.01644
	GO:0010340	molecular_function	carboxyl-O-methyltransferase activity	4	8	0.02393
	GO:0051998	molecular_function	protein carboxyl O-methyltransferase activity	4	8	0.02393
	GO:0008146	molecular_function	sulfotransferase activity	7	43	0.07686
	GO:0005544	molecular_function	calcium-dependent phospholipid binding	7	25	0.006441
	GO:0016714	molecular_function	oxidoreductase activity, acting on paired donors, with incorporation or reduction of molecular oxygen, reduced pteridine as one donor, and incorporation of one atom of oxygen	4	8	0.02393
34℃-2h vs 28℃-2h down-regulated
	GOID	Ontology	Term	Number of genes in the list	Number of genes on microarray	p-value
	GO:0009266	biological_process	response to temperature stimulus	3	32	0.03114
	GO:0021954	biological_process	central nervous system neuron development	3	21	0.01195
	GO:0005488	molecular_function	binding	44	9123	0.01596
	GO:0000166	molecular_function	nucleotide binding	21	2300	0.0008281
	GO:0036094	molecular_function	small molecule binding	21	2422	0.001608
	GO:0003676	molecular_function	nucleic acid binding	30	2821	9.361e-08
	GO:0005283	molecular_function	sodium:amino acid symporter activity	2	6	0.0323
	GO:0005416	molecular_function	cation:amino acid symporter activity	2	6	0.0323
	GO:0003725	molecular_function	double-stranded RNA binding	4	23	0.0004215
34℃-48h vs 28℃-48h down-regulated
	GOID	Ontology	Term	Number of genes in the list	Number of genes on microarray	p-value
	GO:0006284	biological_process	base-excision repair	2	5	0.09378
	GO:0009058	biological_process	biosynthetic process	47	1274	2.324e-06
	GO:0008015	biological_process	blood circulation	5	35	0.01201
	GO:0007049	biological_process	cell cycle	34	275	5.784e-18
	GO:0000075	biological_process	cell cycle checkpoint	3	18	0.09684
	GO:0022403	biological_process	cell cycle phase	18	136	1.632e-09
	GO:0022402	biological_process	cell cycle process	18	162	1.988e-08
	GO:0051301	biological_process	cell division	19	150	9.734e-10
	GO:0007160	biological_process	cell-matrix adhesion	4	25	0.02857
	GO:0031589	biological_process	cell-substrate adhesion	4	25	0.02857
	GO:0044249	biological_process	cellular biosynthetic process	45	1175	1.763e-06
	GO:0016043	biological_process	cellular component organization	32	892	0.0004683
	GO:0071842	biological_process	cellular component organization at cellular level	31	788	0.0001218
	GO:0071840	biological_process	cellular component organization or biogenesis	32	966	0.002025
	GO:0071841	biological_process	cellular component organization or biogenesis at cellular level	31	853	0.0005042
	GO:0034645	biological_process	cellular macromolecule biosynthetic process	29	684	6.538e-05
	GO:0044260	biological_process	cellular macromolecule metabolic process	64	2538	0.001918
	GO:0044237	biological_process	cellular metabolic process	87	3591	0.0003268
	GO:0034641	biological_process	cellular nitrogen compound metabolic process	50	1314	3.455e-07
	GO:0009987	biological_process	cellular process	171	7123	8.482e-09
	GO:0048610	biological_process	cellular process involved in reproduction	5	56	0.07015
	GO:0051716	biological_process	cellular response to stimulus	42	1702	0.04616
	GO:0033554	biological_process	cellular response to stress	15	160	3.222e-06
	GO:0051276	biological_process	chromosome organization	11	228	0.03544
	GO:0003013	biological_process	circulatory system process	5	35	0.01201
	GO:0000910	biological_process	cytokinesis	4	23	0.02179
	GO:0009262	biological_process	deoxyribonucleotide metabolic process	3	7	0.008514
	GO:0009582	biological_process	detection of abiotic stimulus	10	59	2.757e-06
	GO:0009581	biological_process	detection of external stimulus	10	59	2.757e-06
	GO:0009583	biological_process	detection of light stimulus	10	40	8.494e-08
	GO:0051606	biological_process	detection of stimulus	10	59	2.757e-06
	GO:0000077	biological_process	DNA damage checkpoint	3	11	0.02887
	GO:0031570	biological_process	DNA integrity checkpoint	3	11	0.02887
	GO:0006259	biological_process	DNA metabolic process	34	329	1.192e-15
	GO:0006310	biological_process	DNA recombination	4	30	0.05054
	GO:0006281	biological_process	DNA repair	13	124	7.195e-06
	GO:0006260	biological_process	DNA replication	23	99	5.784e-18
	GO:0006261	biological_process	DNA-dependent DNA replication	10	32	1.141e-08
	GO:0006270	biological_process	DNA-dependent DNA replication initiation	7	14	1.381e-07
	GO:0009396	biological_process	folic acid-containing compound biosynthetic process	3	11	0.02887
	GO:0006760	biological_process	folic acid-containing compound metabolic process	3	13	0.04486
	GO:0006545	biological_process	glycine biosynthetic process	3	5	0.002673
	GO:0006544	biological_process	glycine metabolic process	3	16	0.07632
	GO:0007186	biological_process	G-protein coupled receptor signaling pathway	16	460	0.07317
	GO:0060047	biological_process	heart contraction	5	22	0.001404
	GO:0003015	biological_process	heart process	5	22	0.001404
	GO:0006629	biological_process	lipid metabolic process	14	328	0.02623
	GO:0000279	biological_process	M phase	17	124	2.971e-09
	GO:0051327	biological_process	M phase of meiotic cell cycle	5	27	0.003436
	GO:0000087	biological_process	M phase of mitotic cell cycle	14	90	2.82e-08
	GO:0009059	biological_process	macromolecule biosynthetic process	29	695	8.765e-05
	GO:0043170	biological_process	macromolecule metabolic process	81	2968	1.028e-05
	GO:0007140	biological_process	male meiosis	2	5	0.09378
	GO:0007126	biological_process	meiosis	5	27	0.003436
	GO:0051321	biological_process	meiotic cell cycle	5	27	0.003436
	GO:0045132	biological_process	meiotic chromosome segregation	2	5	0.09378
	GO:0008152	biological_process	metabolic process	139	4896	1.457e-11
	GO:0007018	biological_process	microtubule-based movement	10	78	3.226e-05
	GO:0007017	biological_process	microtubule-based process	11	125	0.0003048
	GO:0007067	biological_process	mitosis	14	89	2.541e-08
	GO:0000278	biological_process	mitotic cell cycle	17	121	2.298e-09
	GO:0050869	biological_process	negative regulation of B cell activation	2	5	0.09378
	GO:0045578	biological_process	negative regulation of B cell differentiation	2	5	0.09378
	GO:0050866	biological_process	negative regulation of cell activation	2	5	0.09378
	GO:0002683	biological_process	negative regulation of immune system process	2	5	0.09378
	GO:0002695	biological_process	negative regulation of leukocyte activation	2	5	0.09378
	GO:0051250	biological_process	negative regulation of lymphocyte activation	2	5	0.09378
	GO:0045620	biological_process	negative regulation of lymphocyte differentiation	2	5	0.09378
	GO:0050877	biological_process	neurological system process	11	185	0.008214
	GO:0006807	biological_process	nitrogen compound metabolic process	52	1357	1.41e-07
	GO:0000280	biological_process	nuclear division	14	91	3.132e-08
	GO:0090304	biological_process	nucleic acid metabolic process	35	751	7.419e-07
	GO:0006139	biological_process	nucleobase-containing compound metabolic process	46	1093	8.694e-08
	GO:0009132	biological_process	nucleoside diphosphate metabolic process	2	5	0.09378
	GO:0006753	biological_process	nucleoside phosphate metabolic process	11	266	0.09378
	GO:0009117	biological_process	nucleotide metabolic process	11	266	0.09378
	GO:0048285	biological_process	organelle fission	14	96	5.74e-08
	GO:0006996	biological_process	organelle organization	26	554	3.947e-05
	GO:0055114	biological_process	oxidation-reduction process	29	688	7.251e-05
	GO:0007602	biological_process	phototransduction	10	28	2.971e-09
	GO:0044238	biological_process	primary metabolic process	105	3893	2.4e-07
	GO:0018298	biological_process	protein-chromophore linkage	9	28	5.984e-08
	GO:0050864	biological_process	regulation of B cell activation	2	5	0.09378
	GO:0045577	biological_process	regulation of B cell differentiation	2	5	0.09378
	GO:0071156	biological_process	regulation of cell cycle arrest	3	18	0.09684
	GO:0002694	biological_process	regulation of leukocyte activation	2	5	0.09378
	GO:0051249	biological_process	regulation of lymphocyte activation	2	5	0.09378
	GO:0045619	biological_process	regulation of lymphocyte differentiation	2	5	0.09378
	GO:0007346	biological_process	regulation of mitotic cell cycle	4	25	0.02857
	GO:0009628	biological_process	response to abiotic stimulus	10	138	0.003392
	GO:0006974	biological_process	response to DNA damage stimulus	15	142	8.086e-07
	GO:0009605	biological_process	response to external stimulus	11	160	0.002483
	GO:0009416	biological_process	response to light stimulus	10	74	2.07e-05
	GO:0009314	biological_process	response to radiation	10	79	3.589e-05
	GO:0050896	biological_process	response to stimulus	54	2354	0.04809
	GO:0006950	biological_process	response to stress	20	479	0.002996
	GO:0007600	biological_process	sensory perception	10	125	0.001637
	GO:0050953	biological_process	sensory perception of light stimulus	10	91	0.0001218
	GO:0009070	biological_process	serine family amino acid biosynthetic process	3	11	0.02887
	GO:0003008	biological_process	system process	16	227	4.259e-05
	GO:0007601	biological_process	visual perception	10	91	0.0001218
	GO:0005623	cellular_component	cell	186	8890	1.464e-05
	GO:0044464	cellular_component	cell part	186	8890	1.464e-05
	GO:0044427	cellular_component	chromosomal part	16	145	1.507e-07
	GO:0005694	cellular_component	chromosome	21	209	3.977e-09
	GO:0000775	cellular_component	chromosome, centromeric region	7	20	2.113e-06
	GO:0044430	cellular_component	cytoskeletal part	20	287	2.677e-06
	GO:0005856	cellular_component	cytoskeleton	25	478	1.033e-05
	GO:0005576	cellular_component	extracellular region	22	515	0.001033
	GO:0031234	cellular_component	extrinsic to internal side of plasma membrane	4	20	0.01395
	GO:0019897	cellular_component	extrinsic to plasma membrane	4	34	0.07548
	GO:0005834	cellular_component	heterotrimeric G-protein complex	4	20	0.01395
	GO:0005882	cellular_component	intermediate filament	6	70	0.03404
	GO:0045111	cellular_component	intermediate filament cytoskeleton	6	70	0.03404
	GO:0009898	cellular_component	internal side of plasma membrane	4	20	0.01395
	GO:0005622	cellular_component	intracellular	149	6193	1.378e-07
	GO:0043231	cellular_component	intracellular membrane-bounded organelle	83	3570	0.002067
	GO:0043232	cellular_component	intracellular non-membrane-bounded organelle	44	990	4.819e-08
	GO:0043229	cellular_component	intracellular organelle	107	4290	7.061e-06
	GO:0044446	cellular_component	intracellular organelle part	44	1147	2.302e-06
	GO:0044424	cellular_component	intracellular part	129	5224	4.909e-07
	GO:0032991	cellular_component	macromolecular complex	41	1578	0.02326
	GO:0043227	cellular_component	membrane-bounded organelle	83	3571	0.002067
	GO:0005874	cellular_component	microtubule	13	109	1.948e-06
	GO:0015630	cellular_component	microtubule cytoskeleton	14	153	1.124e-05
	GO:0043228	cellular_component	non-membrane-bounded organelle	44	990	4.819e-08
	GO:0031513	cellular_component	nonmotile primary cilium	3	5	0.002673
	GO:0005634	cellular_component	nucleus	68	2556	0.0002254
	GO:0043226	cellular_component	organelle	107	4293	7.174e-06
	GO:0044422	cellular_component	organelle part	44	1159	2.757e-06
	GO:0001750	cellular_component	photoreceptor outer segment	3	5	0.002673
	GO:0072372	cellular_component	primary cilium	3	5	0.002673
	GO:0043234	cellular_component	protein complex	37	1118	0.0005248
	GO:0005819	cellular_component	spindle	3	11	0.02887
	GO:0030554	molecular_function	adenyl nucleotide binding	46	1352	2.404e-05
	GO:0032559	molecular_function	adenyl ribonucleotide binding	46	1351	2.392e-05
	GO:0005524	molecular_function	ATP binding	46	1346	2.189e-05
	GO:0005488	molecular_function	binding	227	9123	1.208e-14
	GO:0005509	molecular_function	calcium ion binding	21	592	0.01511
	GO:0003824	molecular_function	catalytic activity	144	5103	7.661e-12
	GO:0043169	molecular_function	cation binding	78	3040	0.0001513
	GO:0050662	molecular_function	coenzyme binding	11	197	0.01357
	GO:0048037	molecular_function	cofactor binding	13	279	0.01904
	GO:0004146	molecular_function	dihydrofolate reductase activity	3	5	0.002673
	GO:0003677	molecular_function	DNA binding	47	1584	0.0005312
	GO:0004175	molecular_function	endopeptidase activity	13	317	0.05054
	GO:0005504	molecular_function	fatty acid binding	3	15	0.06471
	GO:0008417	molecular_function	fucosyltransferase activity	3	17	0.09118
	GO:0020037	molecular_function	heme binding	9	158	0.03404
	GO:0016787	molecular_function	hydrolase activity	55	1926	0.0003015
	GO:0016814	molecular_function	hydrolase activity, acting on carbon-nitrogen (but not peptide) bonds, in cyclic amidines	4	26	0.03186
	GO:0016860	molecular_function	intramolecular oxidoreductase activity	4	26	0.03186
	GO:0016863	molecular_function	intramolecular oxidoreductase activity, transposing C=C bonds	3	5	0.002673
	GO:0043167	molecular_function	ion binding	78	3041	0.0001513
	GO:0005506	molecular_function	iron ion binding	15	315	0.006351
	GO:0046872	molecular_function	metal ion binding	76	3004	0.0003268
	GO:0003777	molecular_function	microtubule motor activity	7	43	0.0003278
	GO:0033293	molecular_function	monocarboxylic acid binding	4	22	0.01861
	GO:0003774	molecular_function	motor activity	7	88	0.02173
	GO:0050661	molecular_function	NADP binding	4	28	0.04005
	GO:0003676	molecular_function	nucleic acid binding	64	2821	0.02573
	GO:0017111	molecular_function	nucleoside-triphosphatase activity	19	607	0.09144
	GO:0000166	molecular_function	nucleotide binding	68	2300	7.249e-06
	GO:0016491	molecular_function	oxidoreductase activity	37	789	2.4e-07
	GO:0016614	molecular_function	oxidoreductase activity, acting on CH-OH group of donors	8	105	0.01288
	GO:0016717	molecular_function	oxidoreductase activity, acting on paired donors, with oxidation of a pair of donors resulting in the reduction of molecular oxygen to two molecules of water	2	5	0.09378
	GO:0016645	molecular_function	oxidoreductase activity, acting on the CH-NH group of donors	3	12	0.03619
	GO:0016646	molecular_function	oxidoreductase activity, acting on the CH-NH group of donors, NAD or NADP as acceptor	3	10	0.0232
	GO:0016616	molecular_function	oxidoreductase activity, acting on the CH-OH group of donors, NAD or NADP as acceptor	8	104	0.01215
	GO:0001871	molecular_function	pattern binding	5	44	0.02857
	GO:0070011	molecular_function	peptidase activity, acting on L-amino acid peptides	16	454	0.06471
	GO:0009881	molecular_function	photoreceptor activity	9	29	8.234e-08
	GO:0030247	molecular_function	polysaccharide binding	5	44	0.02857
	GO:0017076	molecular_function	purine nucleotide binding	53	1848	0.0003662
	GO:0035639	molecular_function	purine ribonucleoside triphosphate binding	53	1837	0.0003278
	GO:0032555	molecular_function	purine ribonucleotide binding	53	1846	0.0003593
	GO:0016462	molecular_function	pyrophosphatase activity	19	617	0.09814
	GO:0032553	molecular_function	ribonucleotide binding	53	1846	0.0003593
	GO:0036094	molecular_function	small molecule binding	70	2422	1.033e-05
	GO:0046906	molecular_function	tetrapyrrole binding	9	163	0.04051
